# Supplementary material for: Porous Organic Polymers-Supported Zeigler-Natta Catalysts for Preparing Highly Isotactic Polypropylene with Broad Molecular Weight Distribution
Source: MDPI journal article supplement (doi:10.3390/polym15030555), 2023-01-21
Supplement: s1 [file s1]

# Supplementary Material: Porous organic polymers-supported Zeigler-Natta catalysts for preparing highly isotactic polypropylene with broad molecular weight distribution

Xiong Wang, Dong Wu, Xuemei Mu, Wenqian Kang, Guangquan Li, Anping Huang and Yuan Xie

## Table of contents

1. Figure S1. Energy dispersive spectroscopy (EDS) analysis results of POP and prepared Cat-1/2/3/4.
2. Figure S2. SEM photos of POP3120T support. The SEM characterization of POP support was conducted on a HITACHI S4800 (Tokyo, Japan).

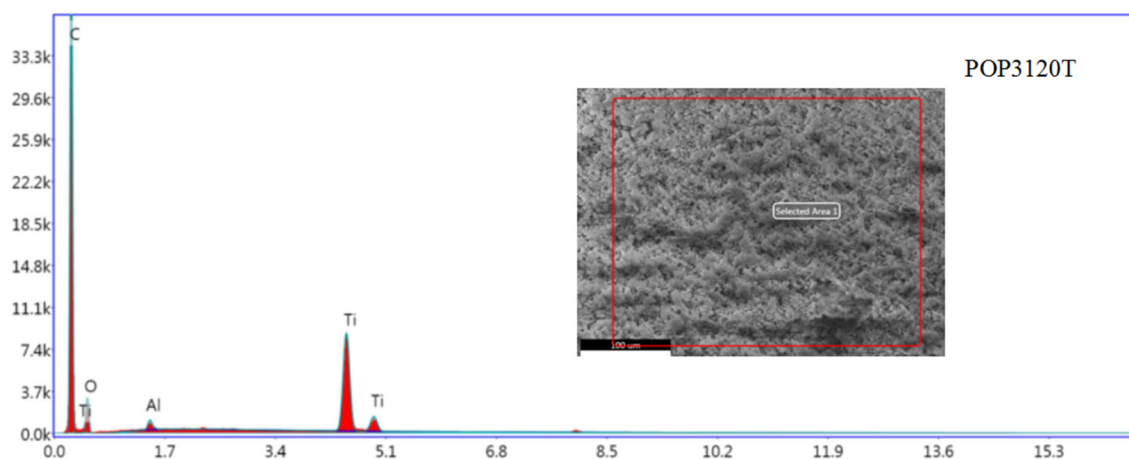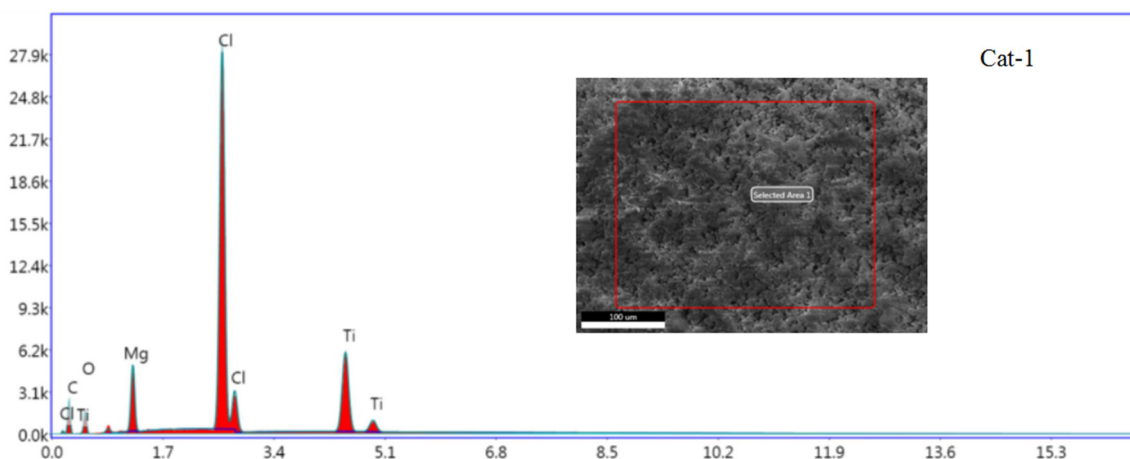

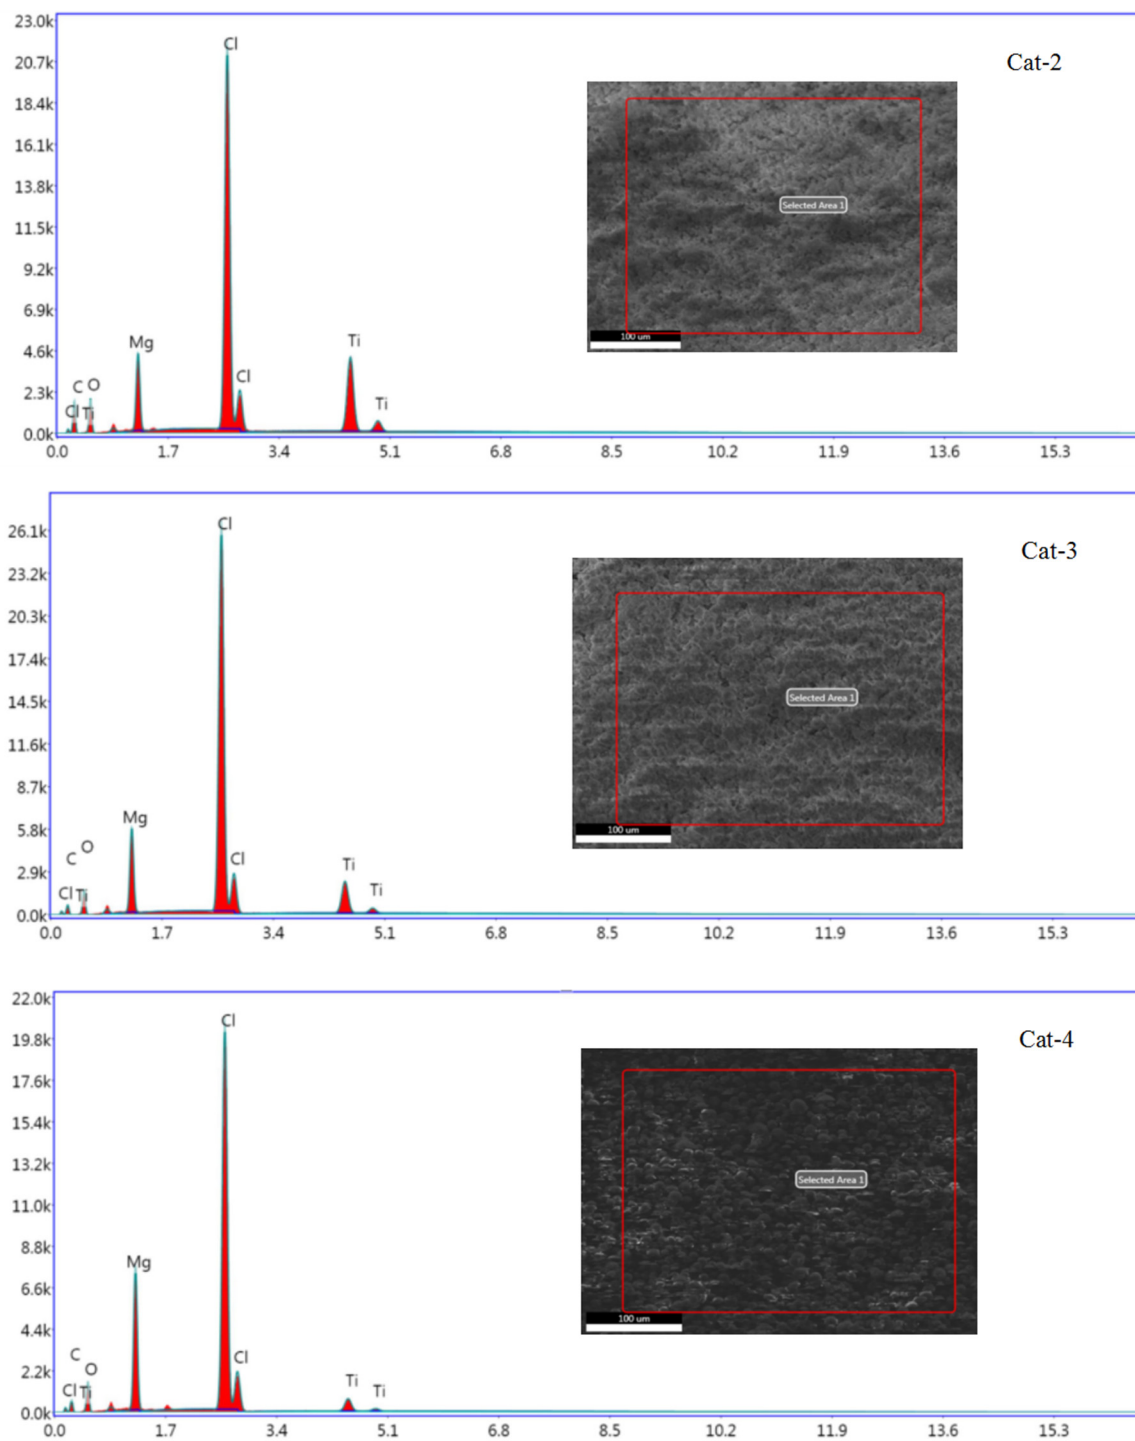

**Figure S1.** Energy dispersive spectroscopy (EDS) analysis results of POP3120T and prepared Cat-1/2/3/4. EDS mapping was conducted on a Team Octane Prime (EDAX, USA ) equipped on a Philips XL20 SEM.

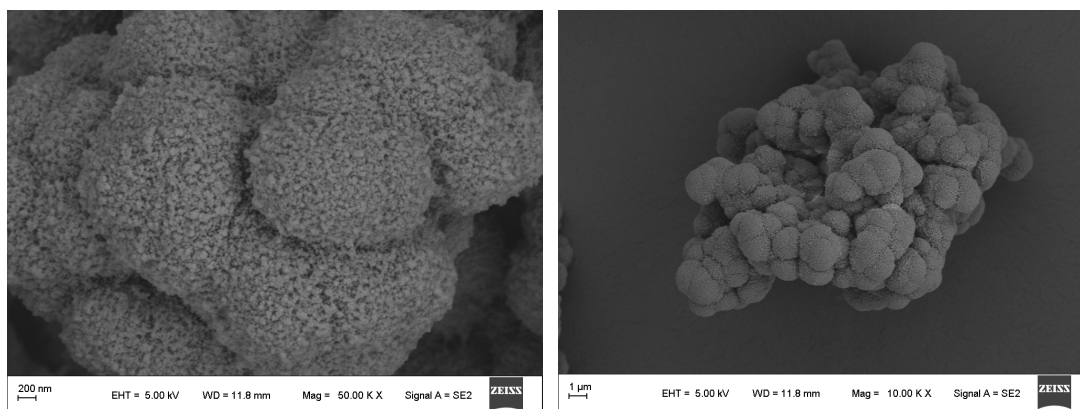

**Figure S2.** SEM photos of POP3120T support.

Calculation method of mmmm sequence:

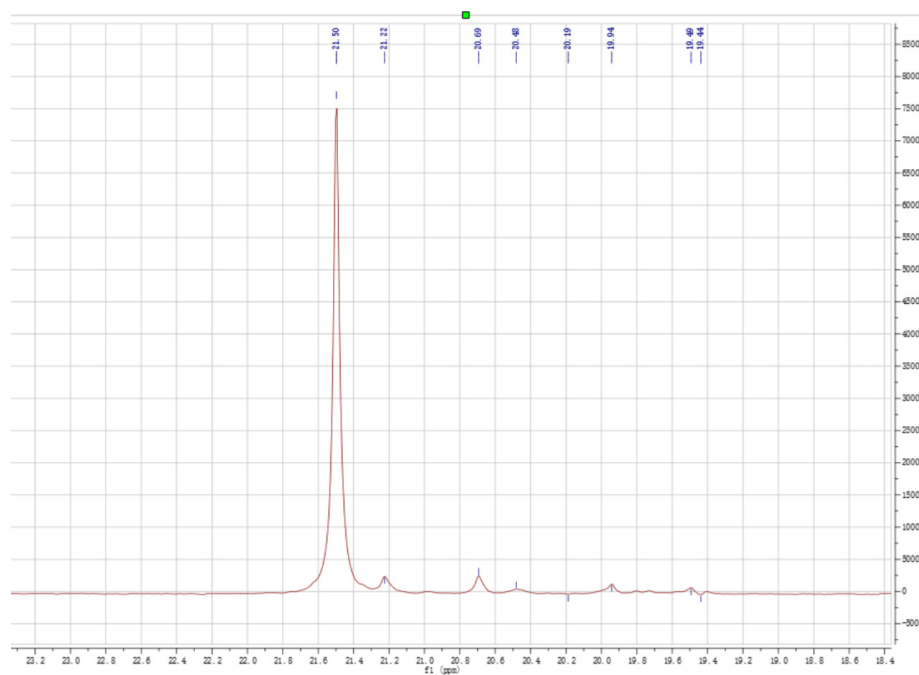

In this case, 5 signal peaks were observed, with [mmmm], [mmmr], [mmrr], [mmrm], [rrrr] from left to right. The last peak is caused by S/N ratio. The isotacticity was calculated by  $\frac{[\text{mmmm}]}{([\text{mmmm}] + [\text{mmmr}] + [\text{mmrr}] + [\text{mmrm}] + [\text{rrrr}])}$ . (peak area value)
